# Supplementary material for: Detection and quantitation of copy number variation in the voltage-gated sodium channel gene of the mosquito Culex quinquefasciatus
Source: PubMed Central journal article supplement (PMC5517494; doi:10.1038/s41598-017-06080-8), 2017-07-19
Supplement: 41598_2017_6080_MOESM1_ESM.pdf [file 41598_2017_6080_MOESM1_ESM.pdf]

**Supplementary Information to:**

**Detection and quantitation of copy number variation in the voltage-gated sodium channel  
gene of the mosquito *Culex quinquefasciatus***

Walter Fabricio Silva Martins<sup>1,2</sup>, Krishanthi Subramaniam<sup>1</sup>, Keith Steen<sup>1</sup>, Henry Maweje<sup>3</sup>,  
Triantafillos Liloglou<sup>4</sup>, Martin James Donnelly<sup>1,5</sup>, Craig Stephen Wilding<sup>6</sup>

<sup>1</sup> Department of Vector Biology, Liverpool School of Tropical Medicine, Liverpool, UK, <sup>2</sup>

*Departamento de Biologia, Universidade Estadual da Paraíba, Campina Grande, Brasil,* <sup>3</sup>

Infectious Diseases Research Collaboration, Kampala, Uganda, <sup>4</sup> Department of Molecular and

Clinical Cancer Medicine, Roy Castle Lung Cancer Research, *Liverpool, UK,* <sup>5</sup> Malaria

Programme, Wellcome Trust Sanger Institute, Cambridge, UK., <sup>6</sup> *Liverpool John Moores*

*University, Liverpool, UK.*

## Supplementary Methods

### **1. RQPS Reference-query probe design and construction**

The RQ-probe design for *C. quinquefasciatus* Nav CNV analysis was constructed by the fusion of a partial fragment of the exon 1 of the *PKA* gene (reference single copy gene in the *Culex* genome) and of exon 20 of the *Nav* gene to a fragment of 386 bp of the *Actin* gene (CPIJ012573) used as stuffer DNA (Figure SM1). A SNP that differentiates the RQ-probe allele construct from the gDNA allele was introduced on the selected fragment of each gene as shown in Figure SM1.

The RQ plasmid construction was executed through two rounds of PCR. The first step was conducted in a 50  $\mu$ l reaction containing approximately 40 ng of genomic DNA, 1x Phusion HF buffer, 200  $\mu$ M of each dNTP, 0.4  $\mu$ M of each primer Cx.ref-FI and Cx.quer-RI (Table SM1, Figure SM2) and 0.02 U/ $\mu$ l of Phusion DNA polymerase. Cycling conditions were 98 °C for 30 sec, 25 cycles of 98 °C for 10 sec, 58 °C for 30 sec and 72 °C for 15 sec, with a final extension of 72 °C for 5 min. The second round of the fusion PCR was carried out using the same concentration and conditions of the first, with the exception of the genomic DNA and primers, which were replaced by the product of the first reaction diluted 1:10 and the primers Cx.ref-FII and Cx.quer-RII, respectively.

The PCR product from the second round of the fusion PCR was loaded on a 2% agarose gel, and then the 551 bp fused fragment (Figure SM2) was extracted, purified and cloned into the pJet1.2 PCR vector (Thermo Scientific). Finally, after the plasmid had been purified and sequenced to confirm the correct insertion of the chimeric QR-probe in the vector, it was linearized with *AclI*.

A)

5`-ATGGGAAACAACGCAACTTCAACAAATAAAAAAGTAGATGCCGCAGAAAGTGTA  
AASAATTCCTGGATCAAGCTAAAGAAGATT-3`

B)

5`-GATCGAATCCATGTGGGACTGCATGCTGGTGGGCGACGTGWCCTGCATTCCGTTCT  
TCTTGGCCACCGTAGTGATAGGAA-3`

C)

5`-TGGTATCCTCACCTGAAGTACCCGATCGAGCACGGTATCATCACCAACTGGGATGA  
TATGGAGAAGATCTGGCATCACACCTTCTACAATGAGCTGCGTGTTGCCCCAGAGGAGC  
ACCCAGTCCTGCTGACTGAGGCCCCCTGAACCCCAAGGCTAACCGCGAGAAGATGAC  
TCAGATCATGTTTGAGACCTTCAACTCGCCAGCCATGTATGTTGCCATCCAGGCTGTCCT  
GTCCCTGTACGCTTCCGGTCGTACCACCGGTATCGTTCTGGATTCCGGAGATGGTGTCTC  
TCACACCGTCCCAATCTATGAAGGTTATGCTCTGCCCCATGCCATCCTCCGTCTGGATCT  
GGCTGGTCGCGATCTGACCGACTACCTGATGA-3`

**Figure SM1.** Sequences of genomic DNA used for construction of the RQPS probe. A and B) partial fragments of the *Pka* and *Vgsc* gene respectively, with bold and underlined bases corresponding to a SNP introduced to differentiate RQ-alleles from gDNA sequence. C) Partial fragment of the *Actin* gene (CPIJ012573) used as stuffer region. S; G→C. W, T→A.



**Table SM1.** Primers for RQ plasmid construction by fusion PCR.

| <b>Primer</b>             | <b>Sequence 5`-3`</b>                                             |
|---------------------------|-------------------------------------------------------------------|
| <b>Fusion PCR Step I</b>  |                                                                   |
| Cx.ref-FI                 | GATGCCGCAGAAAGTGTAACAATTCTGGATCAAGCTAAAGAAGATTGGTATCCTCACCTGAAGT  |
| Cx.quer-RI                | AGGTCACGTCGCCACCAGCATGCAGTCCCACATGGATTTCGATCTCATCAGGTAGTCGGTCAGAT |
| <b>Fusion PCR Step II</b> |                                                                   |
| Cx.ref-FII                | ATGGGAAACAACGCAACTTCAACAAATAAAAAAGTAGATGCCGCAGAAAGTGTAACA         |
| Cx.quer-RII               | GAATTCCTTCTATCACTACGGTGGCCAAGAAGAACGGAATGCAGGTCACGTCGCCACCAG      |

### **Construction of the *Vgsc-Pka* plasmid standard for qPCR absolute quantification**

The plasmid used for construction of the standard curve for qPCR absolute quantification was developed by the fusion of partial fragments of the *Vgsc* and *Pka* gene including the PCR and probe region of the Nav-CN assay. The fusion PCR reaction was carried out in two steps. The first round was conducted in a final volume of 50 µl containing approximately 40 ng of gDNA, 1x Phusion HF buffer, 200 µM of each dNTP, 0.4 µM of each primer (Cx.*Vgsc-Pka*-P1: 5'-GCAAAGGATATAACAAAGCAGT-3' and Cx.*Vgsc-Pka*-P2: 5'-AAACCATCTATGCCCTTTGATCTAAGTAGATCCTTTAGTTCTGAC-3') and 0.02 U/µl of Phusion DNA polymerase. For the second step, the same conditions as the first step were used with the first PCR product diluted 1:10 as template and the external primers (Cx.*Vgsc-Pka*-P3: 5'-TCAAAGGGCATAGATGGTTTACAACGTGGACCGCTTC-3' and Cx. *Vgsc-Pka*-P4: 5'-TGCAGTCCCACATGGATTC-3') used. Both steps were amplified with the following conditions: 98 °C for 30 sec, 25 cycles of 98 °C for 10 sec, 57 °C for 30 sec and 72 °C for 15 sec, with a final extension of 72 °C for 5 min. Finally, the plasmid containing the *Vgsc-Pka*

fragment of 488 bp (Figure SM2) was linearized with *AluI* followed by purification of the digested product extracted from a 2% agarose gel.

```
5`-CTATGTGGA ACTCCAGAATATTTGGCACCAGAAATAATTTTAAGCAAAG
GATATAACAAAGCAGTTGACTGGTGGGCATTAGGTGTTCTTGTGTACGAGATG
GCAGCCGGATATCCACCTTTTTTGGCTGATCAGCCAATACAAATTTATGAAAA
AATTGTTTCAGGAAAGGTACGATTTCCATCTCATTTCGGGTCAGAACTAAAG
GATCTACTTAGAAATCTTCTACAAGTTGATTTAACAAAACGTTACGGAAATC
TAAAAGCAGGAGTTAACGACATCAAAGGGCATAGATGGTTTACAACGTGGA
CCGCTTCCCGGACAAGGACCTGCCACGGTGGA ACTTCACCGACTTCATGCACT
CATT CATGATCGTGTTCCGGGTGCTGTGCGGCGAGTGGATCGAATCCATGTGG
GACTGCATGCTGGTGGGCGACGTGTCCTGCATTCCGTTCTTCTTGGCCACCG
TAGTGATAGGAAATTTAGTC-3`
```

**Figure SM3.** Partial sequence of the *Vgsc-Pka* plasmid, which corresponds to the linked partial fragments of the *Vgsc* and *Pka* gene obtained by fusion PCR

## Supplementary Results

|                   |     |                                                                 |     |
|-------------------|-----|-----------------------------------------------------------------|-----|
| <i>Cx.1/1-676</i> | 1   | .....                                                           | 58  |
| <i>Cx.2/1-676</i> | 1   | .....                                                           | 58  |
| <i>Cx.3/1-677</i> | 1   | .....                                                           | 58  |
| <i>Cx.4/1-677</i> | 1   | .....                                                           | 58  |
| <i>Cx.5/1-677</i> | 1   | .....                                                           | 58  |
| <i>Cx.6/1-677</i> | 1   | .....                                                           | 58  |
| <i>Cx.7/1-677</i> | 1   | .....                                                           | 58  |
| <i>Cx.8/1-677</i> | 1   | .....                                                           | 58  |
| <i>Cx.9/1-677</i> | 1   | .....                                                           | 58  |
| Consensus         |     | GGACGCAATCTGGCTTGTAACTTGTTTTTACGAACTTGAGCGCGGCCGCGATGTTT        |     |
| <i>Cx.1/1-676</i> | 59  | .....                                                           | 116 |
| <i>Cx.2/1-676</i> | 59  | .....                                                           | 116 |
| <i>Cx.3/1-677</i> | 59  | .....                                                           | 116 |
| <i>Cx.4/1-677</i> | 59  | .....                                                           | 116 |
| <i>Cx.5/1-677</i> | 59  | .....                                                           | 116 |
| <i>Cx.6/1-677</i> | 59  | .....                                                           | 116 |
| <i>Cx.7/1-677</i> | 59  | .....                                                           | 116 |
| <i>Cx.8/1-677</i> | 59  | .....                                                           | 116 |
| <i>Cx.9/1-677</i> | 59  | .....                                                           | 116 |
| Consensus         |     | GCCTTGATCCAGTTGGAGAAGCGCGATATCCGGTTGAACGCCCTCGGCGATCTTGTTCG     |     |
| <i>Cx.1/1-676</i> | 117 | .....                                                           | 174 |
| <i>Cx.2/1-676</i> | 117 | .....                                                           | 174 |
| <i>Cx.3/1-677</i> | 117 | .....                                                           | 174 |
| <i>Cx.4/1-677</i> | 117 | .....                                                           | 174 |
| <i>Cx.5/1-677</i> | 117 | .....                                                           | 174 |
| <i>Cx.6/1-677</i> | 117 | .....                                                           | 174 |
| <i>Cx.7/1-677</i> | 117 | .....                                                           | 174 |
| <i>Cx.8/1-677</i> | 117 | .....                                                           | 174 |
| <i>Cx.9/1-677</i> | 117 | .....                                                           | 174 |
| Consensus         |     | TTTCGTTGTCGGCTGTGGGCGCCGACAAACTCGAGGAACCAAAGTTGGACAAAAGCAA      |     |
| <i>Cx.1/1-676</i> | 175 | ..... AG .....                                                  | 232 |
| <i>Cx.2/1-676</i> | 175 | ..... AG .....                                                  | 232 |
| <i>Cx.3/1-677</i> | 175 | .....                                                           | 232 |
| <i>Cx.4/1-677</i> | 175 | .....                                                           | 232 |
| <i>Cx.5/1-677</i> | 175 | .....                                                           | 232 |
| <i>Cx.6/1-677</i> | 175 | .....                                                           | 232 |
| <i>Cx.7/1-677</i> | 175 | .....                                                           | 232 |
| <i>Cx.8/1-677</i> | 175 | .....                                                           | 232 |
| <i>Cx.9/1-677</i> | 175 | .....                                                           | 232 |
| Consensus         |     | GGCTAAGAAAAGTTAAGAACCCTGGTTTTGGGAGGGGAAGAGAAGATCGTTGTCAGTGG     |     |
| <i>Cx.1/1-676</i> | 233 | G .....                                                         | 285 |
| <i>Cx.2/1-676</i> | 233 | G .....                                                         | 285 |
| <i>Cx.3/1-677</i> | 233 | .....                                                           | 285 |
| <i>Cx.4/1-677</i> | 233 | .....                                                           | 285 |
| <i>Cx.5/1-677</i> | 233 | .....                                                           | 285 |
| <i>Cx.6/1-677</i> | 233 | .....                                                           | 285 |
| <i>Cx.7/1-677</i> | 233 | .....                                                           | 285 |
| <i>Cx.8/1-677</i> | 233 | .....                                                           | 285 |
| <i>Cx.9/1-677</i> | 233 | .....                                                           | 285 |
| Consensus         |     | AGGGTAGGCTCGCATGCGAGATTCCAATCGC - - - - GGAGCTGTCAAAAACAACAACCA |     |
| <i>Cx.1/1-676</i> | 286 | ..... A - T .....                                               | 342 |
| <i>Cx.2/1-676</i> | 286 | ..... A - T .....                                               | 342 |
| <i>Cx.3/1-677</i> | 286 | .....                                                           | 341 |
| <i>Cx.4/1-677</i> | 286 | .....                                                           | 341 |
| <i>Cx.5/1-677</i> | 286 | .....                                                           | 341 |
| <i>Cx.6/1-677</i> | 286 | .....                                                           | 341 |
| <i>Cx.7/1-677</i> | 286 | .....                                                           | 341 |
| <i>Cx.8/1-677</i> | 286 | .....                                                           | 341 |
| <i>Cx.9/1-677</i> | 286 | ..... T .....                                                   | 343 |
| Consensus         |     | AGACAATTGCACCTTTAGGTGTGGACCTTCATCTG - AATTTTTTTAAAGAACGCAAC     |     |

|            |     |                                                                   |     |
|------------|-----|-------------------------------------------------------------------|-----|
| Cx.1/1-676 | 343 | ..... A . . . . . G . - -                                         | 398 |
| Cx.2/1-676 | 343 | ..... A . . . . . G . - -                                         | 398 |
| Cx.3/1-677 | 342 | .....                                                             | 399 |
| Cx.4/1-677 | 342 | .....                                                             | 399 |
| Cx.5/1-677 | 342 | .....                                                             | 399 |
| Cx.6/1-677 | 342 | .....                                                             | 399 |
| Cx.7/1-677 | 342 | .....                                                             | 399 |
| Cx.8/1-677 | 342 | .....                                                             | 399 |
| Cx.9/1-677 | 344 | ..... A . . . . . G . - -                                         | 399 |
| Consensus  |     | CTTAAAGAATTATTTACTATAGTATGATCGGTATGAACTGTTTGTTTACATCAAAGGT        |     |
|            |     |                                                                   |     |
| Cx.1/1-676 | 399 | .....                                                             | 456 |
| Cx.2/1-676 | 399 | .....                                                             | 456 |
| Cx.3/1-677 | 400 | .....                                                             | 457 |
| Cx.4/1-677 | 400 | .....                                                             | 457 |
| Cx.5/1-677 | 400 | .....                                                             | 457 |
| Cx.6/1-677 | 400 | .....                                                             | 457 |
| Cx.7/1-677 | 400 | .....                                                             | 457 |
| Cx.8/1-677 | 400 | .....                                                             | 457 |
| Cx.9/1-677 | 400 | .....                                                             | 457 |
| Consensus  |     | ACAAATGTGACCTTAAAGTTTTTCGTTCCACCTTTTCTTGCATGCTGTTGGCGATGT         |     |
|            |     |                                                                   |     |
| Cx.1/1-676 | 457 | ..... GC . . . . . G . T . . . . .                                | 514 |
| Cx.2/1-676 | 457 | ..... GC . . . . . G . T . . . . .                                | 514 |
| Cx.3/1-677 | 458 | .....                                                             | 515 |
| Cx.4/1-677 | 458 | .....                                                             | 515 |
| Cx.5/1-677 | 458 | .....                                                             | 515 |
| Cx.6/1-677 | 458 | .....                                                             | 515 |
| Cx.7/1-677 | 458 | .....                                                             | 515 |
| Cx.8/1-677 | 458 | .....                                                             | 515 |
| Cx.9/1-677 | 458 | ..... GC . . . . . G . T . . . . .                                | 515 |
| Consensus  |     | TTTGACAGCTCTAATGCGCACACTAGATCAATCACGAAGACTTCACGCTGGAATACTC        |     |
|            |     |                                                                   |     |
| Cx.1/1-676 | 515 | ..... T . . . . .                                                 | 572 |
| Cx.2/1-676 | 515 | ..... T . . . . .                                                 | 572 |
| Cx.3/1-677 | 516 | .....                                                             | 573 |
| Cx.4/1-677 | 516 | .....                                                             | 573 |
| Cx.5/1-677 | 516 | .....                                                             | 573 |
| Cx.6/1-677 | 516 | .....                                                             | 573 |
| Cx.7/1-677 | 516 | .....                                                             | 573 |
| Cx.8/1-677 | 516 | .....                                                             | 573 |
| Cx.9/1-677 | 516 | ..... T . . . . .                                                 | 573 |
| Consensus  |     | ACGACGAAATTTCTATCACTACGGTGGCCAAGAAGAACGGAATGCAGGACACGTCGC         |     |
|            |     |                                                                   |     |
| Cx.1/1-676 | 573 | ..... . . . . . A . . . . .                                       | 630 |
| Cx.2/1-676 | 573 | ..... . . . . . A . . . . .                                       | 630 |
| Cx.3/1-677 | 574 | .....                                                             | 631 |
| Cx.4/1-677 | 574 | .....                                                             | 631 |
| Cx.5/1-677 | 574 | .....                                                             | 631 |
| Cx.6/1-677 | 574 | .....                                                             | 631 |
| Cx.7/1-677 | 574 | .....                                                             | 631 |
| Cx.8/1-677 | 574 | .....                                                             | 631 |
| Cx.9/1-677 | 574 | ..... . . . . . A . . . . .                                       | 631 |
| Consensus  |     | <u>CCACCAGCATGCAGTCCACATGGATTTCGATCCACTCGCCGCACAGCACCCGGAACAC</u> |     |
|            |     |                                                                   |     |
| Cx.1/1-676 | 631 | .....                                                             | 676 |
| Cx.2/1-676 | 631 | .....                                                             | 676 |
| Cx.3/1-677 | 632 | .....                                                             | 677 |
| Cx.4/1-677 | 632 | .....                                                             | 677 |
| Cx.5/1-677 | 632 | .....                                                             | 677 |
| Cx.6/1-677 | 632 | .....                                                             | 677 |
| Cx.7/1-677 | 632 | .....                                                             | 677 |
| Cx.8/1-677 | 632 | .....                                                             | 677 |
| Cx.9/1-677 | 632 | .....                                                             | 677 |
| Consensus  |     | <u>GATCATGAATGAGTGCATGAAGTTCGGTGAAGTTCCACCGTGGCAGG</u>            |     |

**Figure S1.** Multiple sequence alignment of a partial fragment of the *Vgsc* gene. Alignment was performed using ClustalW. Underlined regions in blue and black correspond to primer and probe binding sites of the QRPS and qPCR and ddPCR assays, respectively



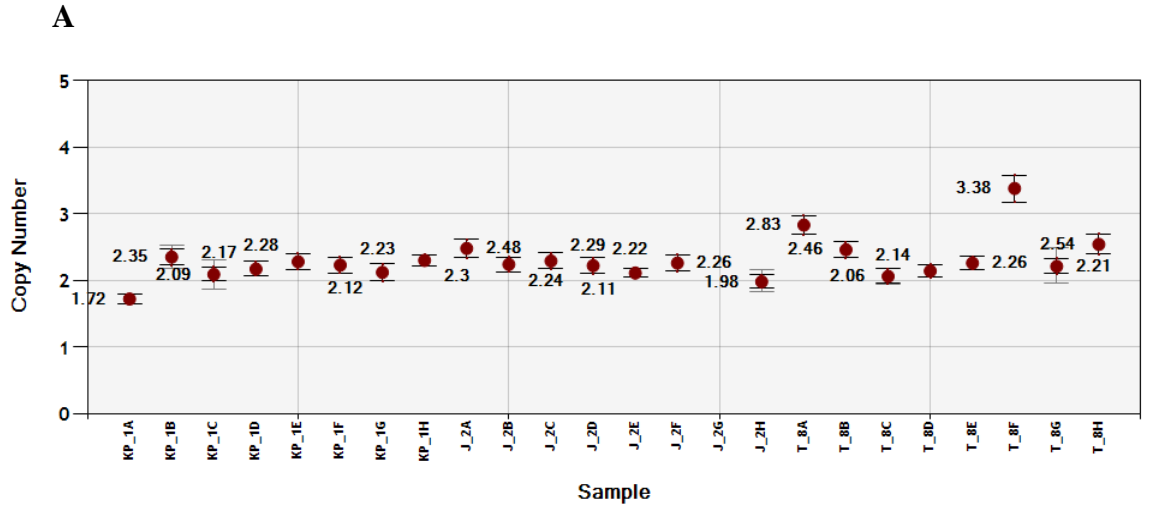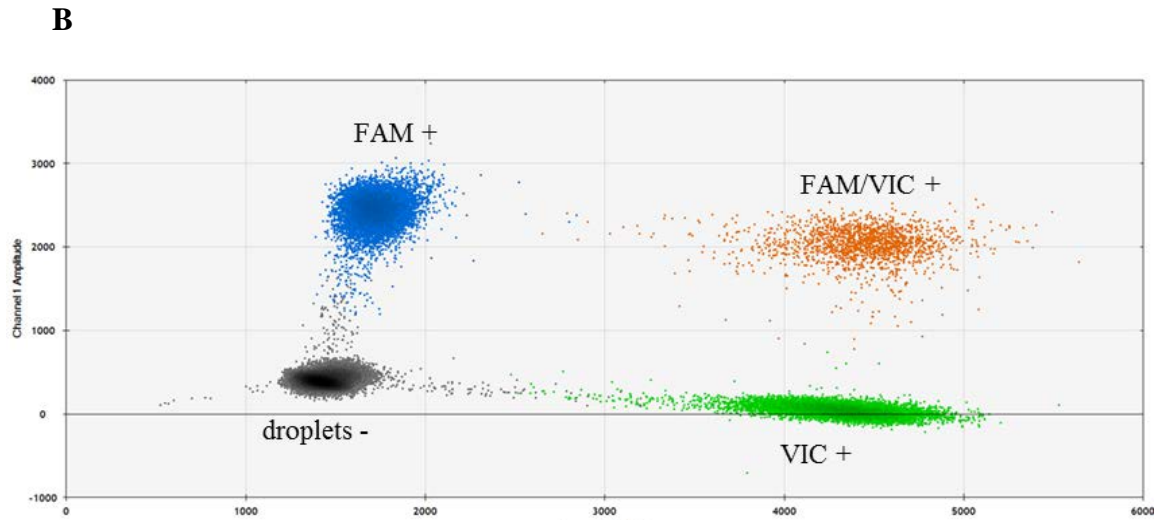

**Figure S2.** ddPCR CN prediction in Ugandan *Culex quinquefasciatus* mosquitoes A) Merges of replicate calculated CNs. The error bars represent the Poisson 95% confidence interval. B) 2-D amplitude plot of the *Vgsc* and *Pka* showing satisfactory PCR conditions to identify four well defined droplets populations.

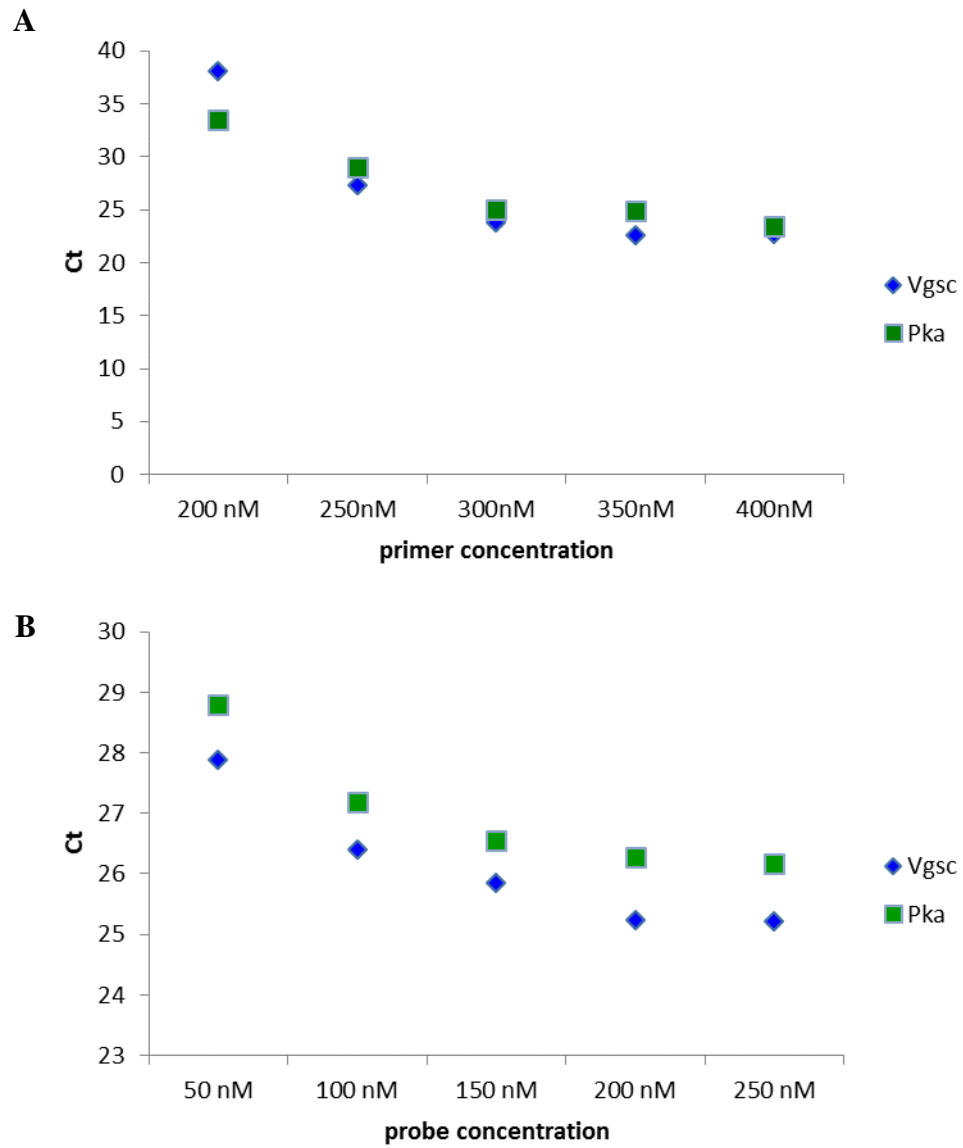

**Figure S3.** Primer and probe validation. A) Primer set titration to identify concentrations with similar patterns of amplification based on SYBR-GREEN detection. B) Probe titration to identify early and constant Ct values.

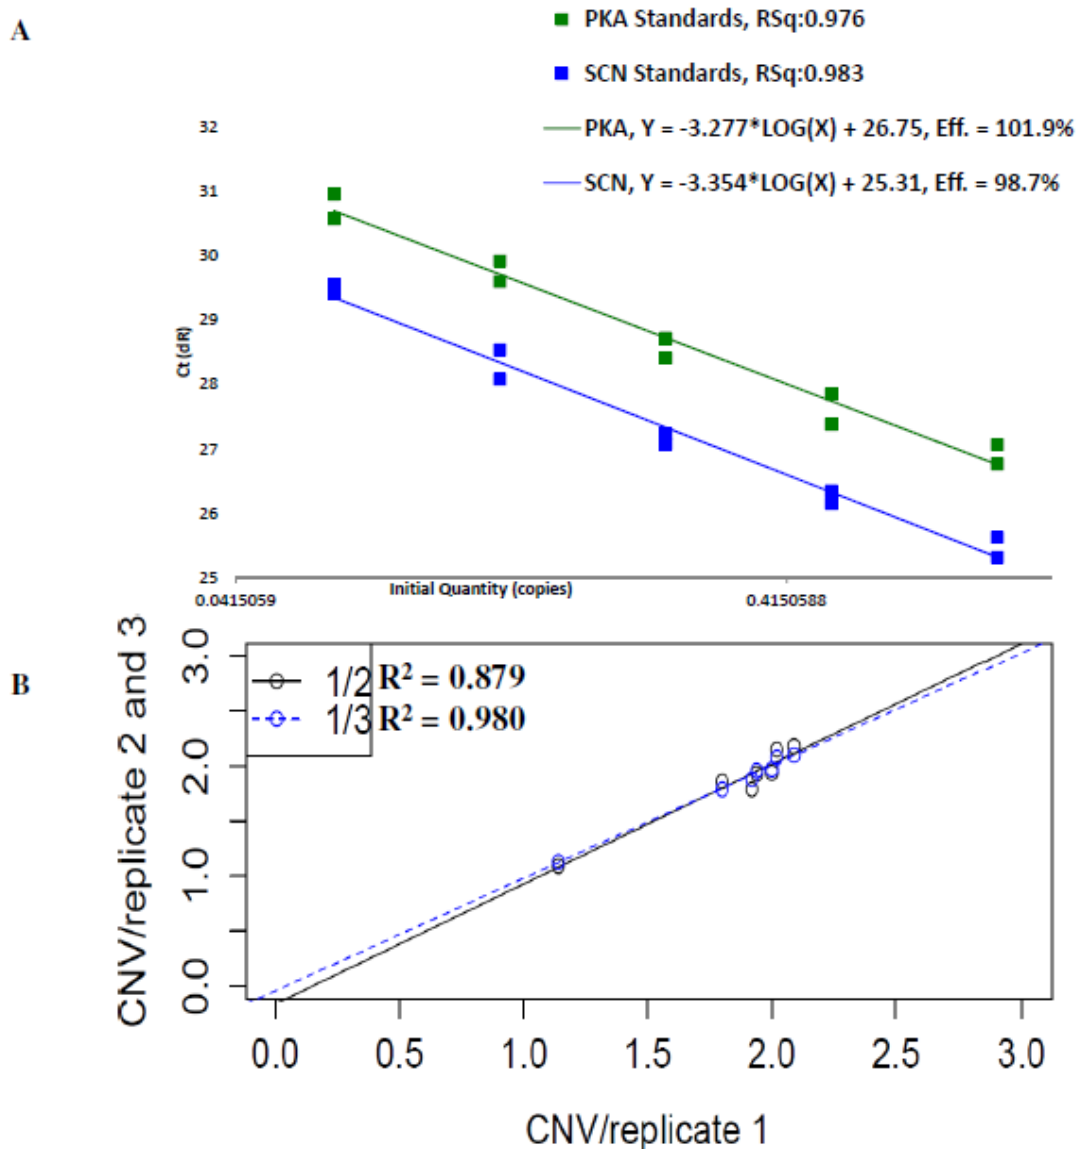

**Figure S4.** Copy number variation assay validation. A) Efficiency of primers and probes in duplex PCR reactions assessed by standard curve with 2-fold DNA dilution. B) *Vgsc*-CN assay intra-experiment reproducibility comparing triplicates of gDNA with unknown CN in three independent experiments. 1/2 and 1/3 correspond to correlation between experiments 1 and 2 and 1 and 3.

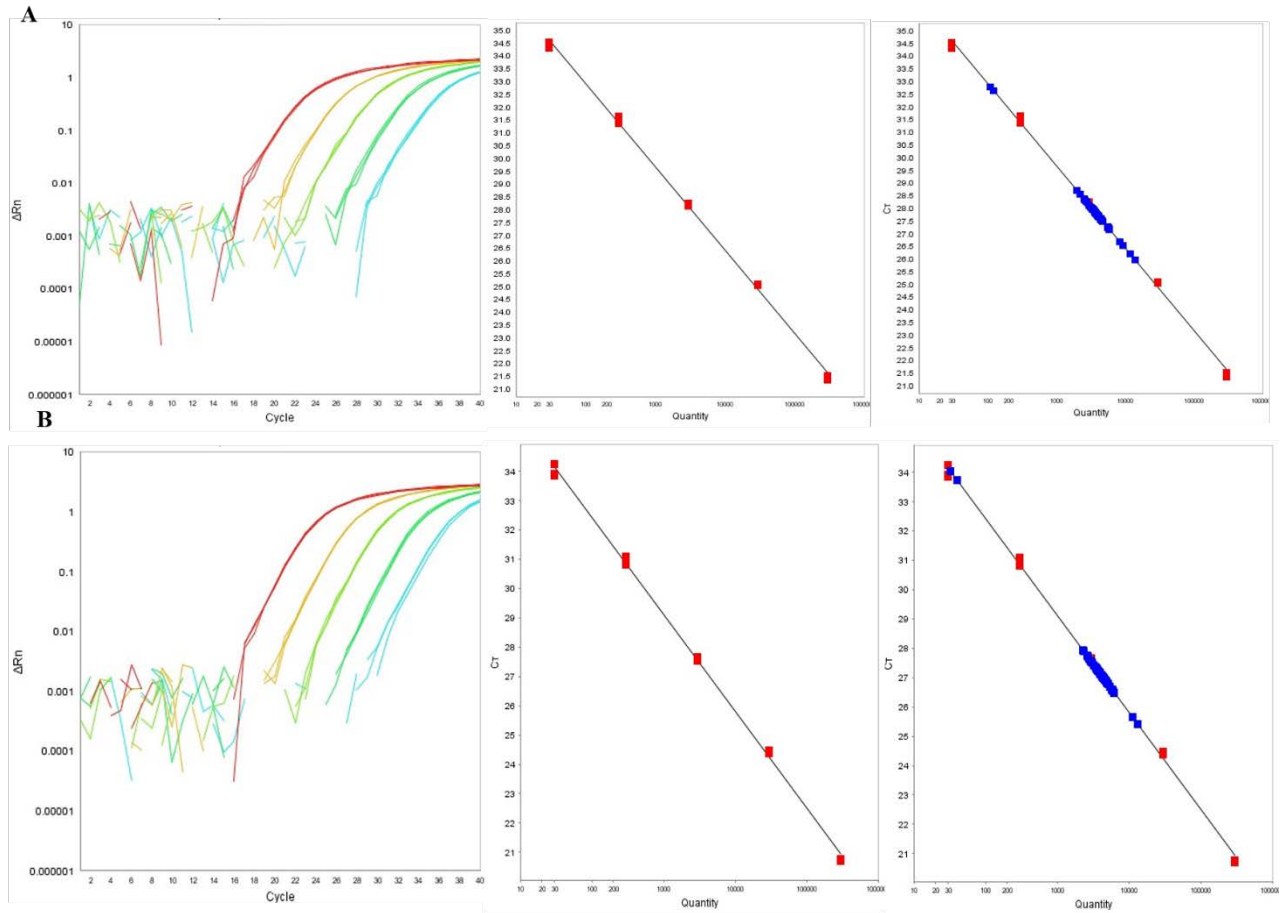

**Figure S5.** qPCR amplification of the *Vgsc-Pka* plasmid serial dilution for absolute quantification using the qPCR-Std method. Panels A and B show the standard curve amplification for the *Vgsc* and *Pka* genes, respectively. Red squares on the standard curve correspond to the five points of the serial dilution ranging from  $3 \times 10^5$  to  $10^1$  copies/ $\mu$ l, whereas the blue squares correspond to quantification of samples with unknown copy number.

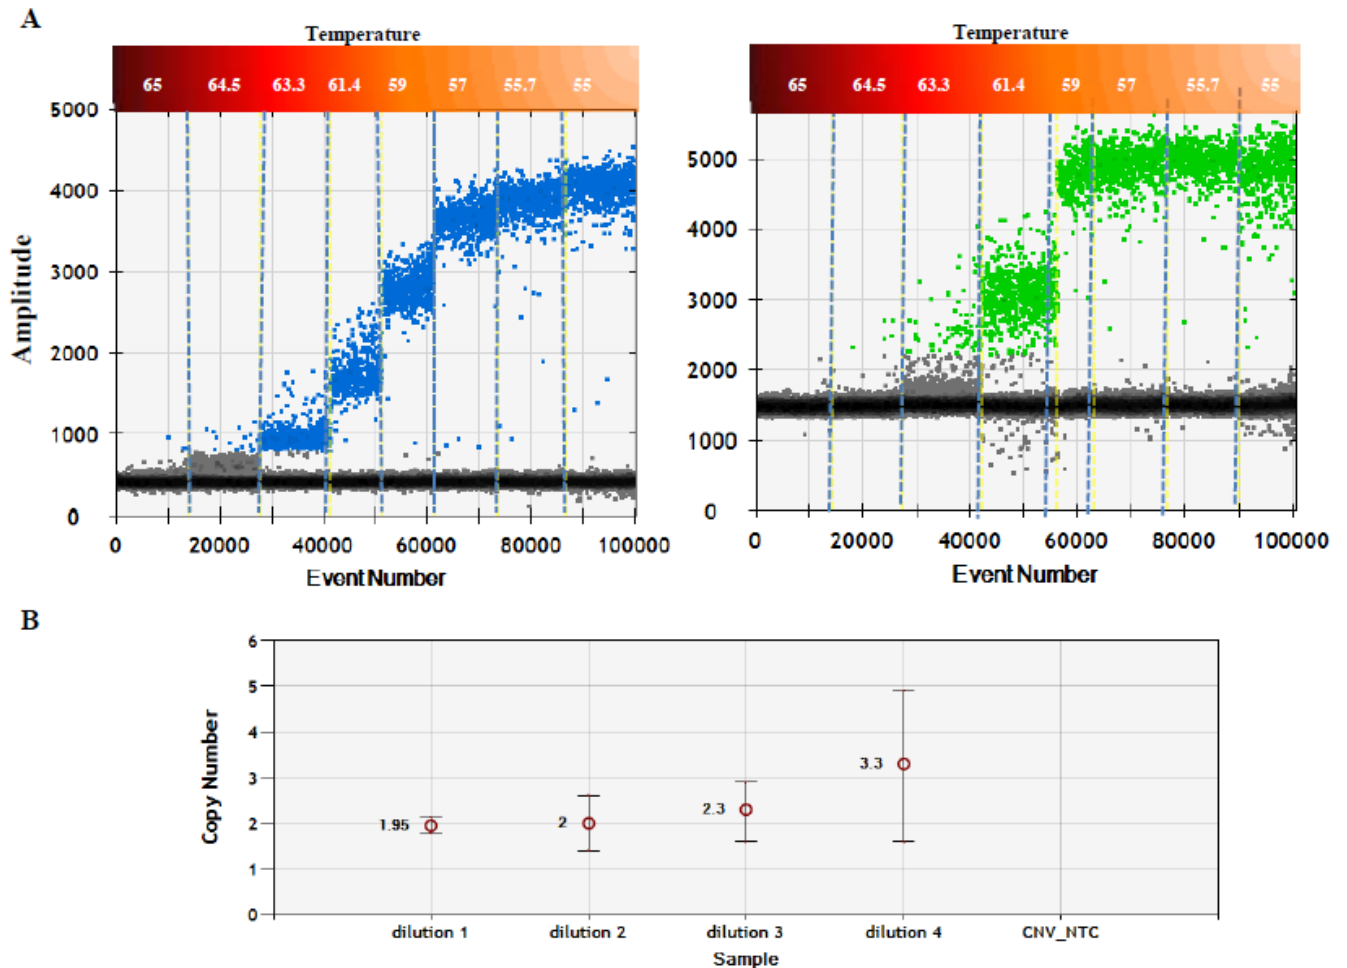

**Figure S6.** Optimization of annealing temperature and concentration of gDNA for application of the *Vgsc*-CN assay *via* ddPCR analysis. A) Thermal gradient to identify appropriate fluorescent droplet amplitudes for the *Vgsc* (blue dots, FAM channel) and *Pka* (green dots, VIC channel) genes. B) Two-fold *Vgsc-Pka* plasmid dilution to identify DNA concentration for precise CN quantification. Dilutions 1 to 4 correspond to concentrations ranging from  $17 \times 10^3$  copies/ $\mu$ l to  $2 \times 10^3$  copies/ $\mu$ l.

**Table S1.** Presence of *Vgsc* exons in different *C. quinquefasciatus* (Johannesburg strain) contigs indicates the presence of two *Vgsc* copies.

|           | COPY 1         | COPY 2         |
|-----------|----------------|----------------|
| Exon 1    | AAWU01013212.1 |                |
| Exon 2    |                |                |
| Exon 3    | AAWU01013208.1 |                |
| Exon 4    | AAWU01013207.1 |                |
| Exon 5    | AAWU01013206.1 |                |
| Exon 6    | AAWU01013204.1 |                |
| Exon 7    | AAWU01013204.1 |                |
| Exon 8    | AAWU01013204.1 |                |
| Exon 9    | AAWU01013204.1 |                |
| Exon 10   | AAWU01013204.1 |                |
| Exon 11   | AAWU01013204.1 |                |
| Exon 12   | AAWU01013202.1 | AAWU01037504.1 |
| Exon 13   | AAWU01013202.1 | AAWU01037504.1 |
| Exon 14   |                | AAWU01037504.1 |
| Exon 15   | AAWU01013201.1 | AAWU01037503.1 |
| Exon 16   | AAWU01013201.1 | AAWU01037503.1 |
| Exon 17   | AAWU01013201.1 | AAWU01037500.1 |
| Exon 18   | AAWU01013201.1 | AAWU01037500.1 |
| Exon 19 C | AAWU01013201.1 | AAWU01037500.1 |
| Exon 19 D | AAWU01013201.1 | AAWU01037500.1 |
| Exon 20   | AAWU01013201.1 | AAWU01037500.1 |
| Exon 21   | AAWU01013201.1 | AAWU01037500.1 |
| Exon 22   | AAWU01013201.1 | AAWU01037499.1 |
| Exon 23   | AAWU01013201.1 | AAWU01037499.1 |
| Exon 24   | AAWU01013201.1 | AAWU01037499.1 |
| Exon 25   | AAWU01013201.1 | AAWU01037499.1 |
| Exon 26 K | AAWU01013201.1 | AAWU01037498.1 |
| Exon 26 1 | AAWU01013201.1 | AAWU01037498.1 |
| Exon 27   | AAWU01013201.1 | AAWU01037496.1 |
| Exon 28   | AAWU01013201.1 | AAWU01037496.1 |
| Exon 29   | AAWU01013201.1 | AAWU01037496.1 |
| Exon 30   | AAWU01013201.1 | AAWU01037496.1 |
| Exon 31   | AAWU01013201.1 | AAWU01037495.1 |
| Exon 32   | AAWU01013201.1 | AAWU01037495.1 |
